# Supplementary material
Source: PubMed Central journal article supplement (PMC3811202)
Supplement: AEM.01744-13_zam999104761so1.pdf [file AEM.01744-13_zam999104761so1.pdf]

1 **SUPPLEMENTAL MATERIAL:**

2 **Table S1:** Primers utilized in this study

3

| Primer Name                                              | Sequence (5' to 3')          | Additional notes                   |
|----------------------------------------------------------|------------------------------|------------------------------------|
| <b>Primers used to amplify promoters for EMSA assays</b> |                              | <b>Used to amplify promoter of</b> |
| <b>p480-F</b>                                            | CTGACACGCAGGCCGGGGCACC       | CKS-1750                           |
| <b>p480-R</b>                                            | CTGTGCCGGACATCCGGCTG         |                                    |
| <b>p711-F</b>                                            | CGTATGACGGTGTCTGTCTGG        | CKS-5296                           |
| <b>p711-R</b>                                            | GCGCTATCTGTTGATTCTTGG        |                                    |
| <b>PACCC-F</b>                                           | GGTCGTTAATCGCATCCCTGTG       | <i>accC</i>                        |
| <b>PACCC-R</b>                                           | GGCTTTTAGTCGGCTTCATCG        |                                    |
| <b>PAHPF-F</b>                                           | GCAAAATCTAATTTCCGCATCGC      | <i>ahpF</i>                        |
| <b>PAHPF-R</b>                                           | GGTATCAAGCATAGTGAGTTCC       |                                    |
| <b>PDEGP-F</b>                                           | GGCGGTGGAATAACCCGAG          | <i>degP</i>                        |
| <b>PDEGP-R</b>                                           | CTAAGCGCCAGGGCGCTTAAC        |                                    |
| <b>PKGA-F</b>                                            | GCTGACACAGTAAGTCGTGG         | <i>dkgA</i>                        |
| <b>PKGA-R</b>                                            | CGCTGTGCTTAAGTCTAGC          |                                    |
| <b>PESAR28F<sup>a</sup></b>                              | TCTTGCCTGTACTATAGTGCAGGTAAAG | <i>esaR</i> (as positive control)  |
| <b>PESAR28R<sup>a</sup></b>                              | CTTAACCTGCACTATAGTACAGGCAAGA |                                    |
| <b>PFABF-F</b>                                           | GGAAGAAGTGACCAACTCTGC        | <i>fabF</i>                        |
| <b>PFABF-R</b>                                           | CGCTTAGACACGTTTCGTC          |                                    |
| <b>PFABI-F</b>                                           | GCGTGGCAACGCCAGCGTTG         | <i>fabI</i>                        |
| <b>PFABI-R</b>                                           | CCTTATGGTCATGGTAGTTGGC       |                                    |
| <b>PFKPA-F</b>                                           | GTCAGCAGACCTCGGCAGAGC        | <i>fkpA</i>                        |
| <b>PFKPA-R</b>                                           | CGGACTGAGGGCCACAC            |                                    |

---

|                  |                                |                          |
|------------------|--------------------------------|--------------------------|
| <b>FUSAF</b>     | GGCCTGGAAGCTTTTGAGGTTGC        | <i>fusA</i>              |
| <b>FUSAR</b>     | GTA CGA GCC ATT TTA TTC CTC G  |                          |
| <b>PGALF-F</b>   | GAACCGTGGCTGTAAGTGTC           | <i>galF, galE</i>        |
| <b>PGALF-R</b>   | GACATGCGTCAATTATGCCG           |                          |
| <b>PGALU-CDN</b> | CTTACCCGCAAGACAGTGCCAGAAGTTAGC | <i>galU, CKS 2738</i>    |
| <b>PGALU-F</b>   | CGTCTGAGCAATAAACACCG           |                          |
| <b>PGLM-F</b>    | CGTTCTGGCCGATACCGCTATTCG       | <i>glmU</i>              |
| <b>PGLM-R</b>    | CTGAGGAACGTAAACGATTTAGC        |                          |
| <b>PGLPF-F</b>   | CCTGCAAGGCGTTGATGATGC          | <i>glpF, glpK</i>        |
| <b>PGLPF-R</b>   | GTTGTTCTGAAGCGAGG              |                          |
| <b>PHTPG-F</b>   | TGACATCAGCAAAGCCGATCG          | <i>htpG</i>              |
| <b>PHTPG-R</b>   | CTGCACGTAGAGTTTCAGACC          |                          |
| <b>PLRHA-F</b>   | CAGAGAGCATCTTTAGTACAGG         | <i>lrhA</i>              |
| <b>PLRHA-R</b>   | GCGGGAAGCTGTGTAGTTGTC          |                          |
| <b>PMGLB-F</b>   | GCGATTCCGCGATGTAACCG           | <i>mglB</i>              |
| <b>PMGLB-R</b>   | GCTGCGTCAAGCCGCGGAAG           |                          |
| <b>PNEMR-F</b>   | CTGTCGCTGTATTGCAGCC            | <i>nemR</i>              |
| <b>PNEMR-R</b>   | CATCCTGGTAGACCAATCG            |                          |
| <b>PNHAR-F</b>   | CCGTCCATTGCGCACCACTG           | <i>nhaR</i>              |
| <b>PNHAR-R</b>   | GACATGCGTCAATTATGCCGGATG       |                          |
| <b>POMPF-F</b>   | CGCCTATGTCACAGGCGTAC           | <i>ompA, down-stream</i> |
| <b>POMPF-R</b>   | CCAGAATGTTGCGCTTCATC           | <i>of ompF</i>           |
| <b>POSMY-F</b>   | CGCGTTTTCAGGGCCATTCTC          | <i>osmY</i>              |
| <b>POSMY-R</b>   | CAACGCTACTGCGGCACAGG           |                          |

---

|                                                          |                            |                          |
|----------------------------------------------------------|----------------------------|--------------------------|
| <b>PPGM-F</b>                                            | CGTCTGGATACGGCCGCGTTTGC    | <i>pgm</i>               |
| <b>PPGM-R</b>                                            | GGCCATTGGCGCTTCTCC         |                          |
| <b>PPHES-F</b>                                           | CATACTTTACGGGCAGGCATAGC    | <i>pheT</i> , downstream |
| <b>PPHES-R</b>                                           | GTTCTGCTAGTTGGGACATG       | of <i>pheS</i>           |
| <b>PRPSB-F</b>                                           | GAGATTGCCATTAATTATTCCGC    | <i>rpsB</i>              |
| <b>PRPSB-R</b>                                           | GTATCCCATACAACCGACCTC      |                          |
| <b>Primers for amplifying coding regions for qRT-PCR</b> |                            | <b>Gene amplified</b>    |
| <b>DKGA-CDNF</b>                                         | GGCAGCCTGAAAATTGTTAGC      | <i>dkgA</i>              |
| <b>DKGA-CDNR</b>                                         | CGTATTAGCCGATAAACGTATCCG   |                          |
| <b>FABF-CDNF</b>                                         | GGAGGACGAACGTGTCTAAGC      | <i>fabF</i>              |
| <b>FABF-CDNR</b>                                         | CGCCAGGTTTAGATTTTACGG      |                          |
| <b>RPSB-CDNF</b>                                         | GAGGTCGGTTGTATGGGATAC      | <i>rpsB</i>              |
| <b>RPSB-CDNR</b>                                         | CAGAGCAAACCTTAATTAAGC      |                          |
| <b>LRHA-CDNF</b>                                         | CTTGTAATAACACCAGGATAGTAG   | <i>lrhA</i>              |
| <b>LRHA-CDNR</b>                                         | GAAGACGGGATTTACTCTTCATCG   |                          |
| <b>GLPF-CDNF</b>                                         | CAACTATCATGAGTCAGACTACAACC | <i>glpF</i>              |
| <b>GLPF-CDNR</b>                                         | GAACTTACGCTTTACGTTTCATGC   |                          |
| <b>MGLB-CDNF</b>                                         | CTTACCCGATGTTCTTCCGC       | <i>mglB</i>              |
| <b>MGLB-CDNR</b>                                         | CTGAGACAGGTTTTCTGATC       |                          |
| <b>27F</b>                                               | AGAGTTTGATCATGGCTCAG       | <i>16S rRNA</i>          |
| <b>1429RLONG</b>                                         | ACCTTGTTACGACTTCACC        |                          |
| <b>qRT-PCR Primers</b>                                   |                            | <b>Target gene</b>       |
| <b>DKGA-RTF</b>                                          | GCCCGGAGAAAGATCAGTACGTTG   | <i>dkgA</i>              |
| <b>DKGA-RTR</b>                                          | GCTTTTGACCAGGCCTTGTTGC     |                          |

---

|                 |                         |                 |
|-----------------|-------------------------|-----------------|
| <b>FABF-RTF</b> | CGTCAATATGGTGGCGGGACATC | <i>fabF</i>     |
| <b>FABF-RTR</b> | AGGCGGTCGCAATGGAAATGC   |                 |
| <b>RPSB-RTF</b> | GCTCAAGGCTGGTGTTCACTTCG | <i>rpsB</i>     |
| <b>RPSB-RTR</b> | ACGCGCACCGAAAATGAATGG   |                 |
| <b>LRHA-RTF</b> | CGTCCGGTGGAGATGATGA     | <i>lrhA</i>     |
| <b>LRHA-RTR</b> | ATCCTTCTGCTGCACCCATT    |                 |
| <b>GLPF-RTF</b> | TCTGGCCGGCATTTC         | <i>glpF</i>     |
| <b>GLPF-RTR</b> | CCTGGCCCACGGAAATC       |                 |
| <b>MGLB-RTF</b> | GATACGGCGATGTGGGATACCG  | <i>mglB</i>     |
| <b>MGLB-RTR</b> | GCGTTAGGGCCTGACAGC      |                 |
| <b>16S-RTF</b>  | GCCAGCAGCCGCGGTAAT      | <i>16S rRNA</i> |
| <b>16S-RTR</b>  | CGCTTTACGCCAGTAATTCC    |                 |

**DNase I footprinting assays**

**Promoter amplified**

|                     |                               |                         |
|---------------------|-------------------------------|-------------------------|
| <b>FAM-PDKGA-R2</b> | /6-FAM/-TTGGTCTGCCATATCCTGC   | <i>P<sub>dkgA</sub></i> |
| <b>PDKGAF</b>       | GCTGACACAGTAAGTCGTGG          |                         |
| <b>FAM-PLRHA-R2</b> | /6-FAM/-TCTGTCATACACACGCTG    | <i>P<sub>lrhA</sub></i> |
| <b>PLRHA-F2</b>     | GCCGTGCATTAATCGTTAATACGG      |                         |
| <b>PGLPF-FAMF</b>   | /6-FAM/-CCTGCAAGGCGTTGATGATGC | <i>P<sub>glpF</sub></i> |
| <b>PGLPF-R</b>      | GTTGTTCCCTGAAGCGAGG           |                         |

---

4 <sup>a</sup> Primer pair annealed to form EsaR binding site in *P<sub>esaR</sub>*

5

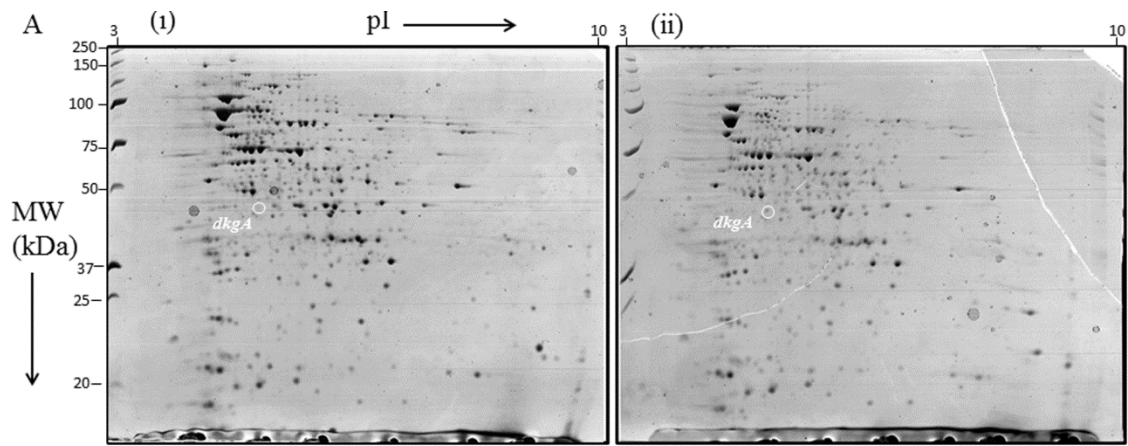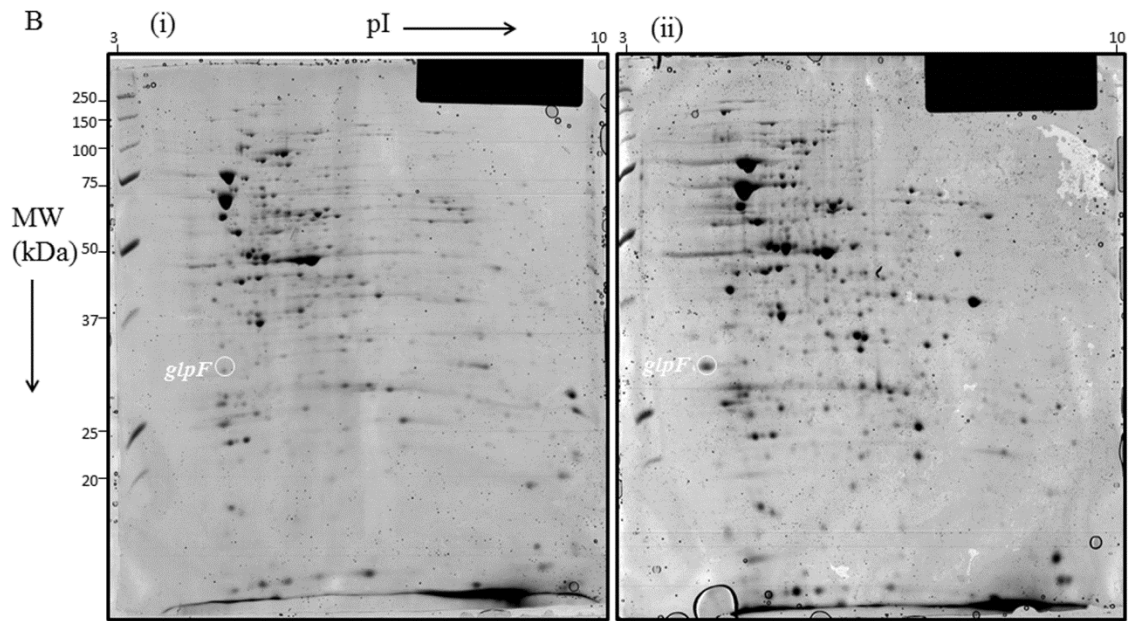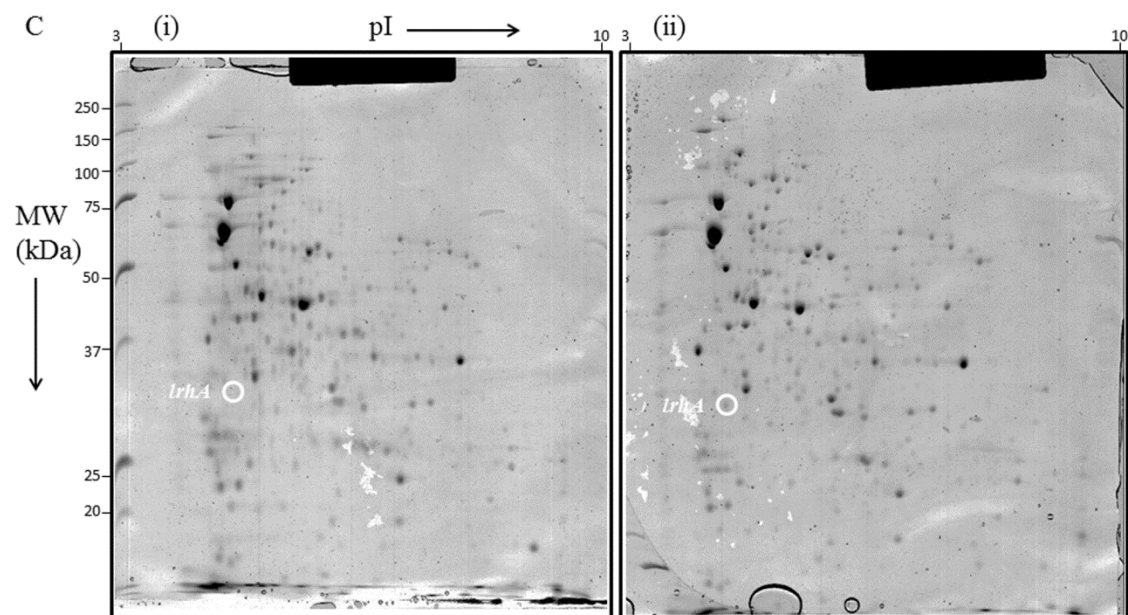

7 **Figure S1:** Two-dimensional SDS PAGE experiments of *P. stewartii* DC283 strains. Panel A (i)  
8 ESN51 and (ii) ESN51 supplemented with 10  $\mu$ M AHL; panels B and C (i) ES $\Delta$ IR pBBR1MCS-  
9 3 (*esaR/esaI*) and (ii) ES $\Delta$ IR pSVB60 (*esaR* complemented) depicting the three trials  
10 identifying differentially expressed protein spots. Locations of protein spots of DkgA, GlpF and  
11 LrhA are marked as examples in panel A, B and C, respectively. The positions of molecular  
12 weight standards are indicated on the left (in kDa) and the isoelectric pH (pI) gradient is  
13 indicated at the top from left to right.  
14

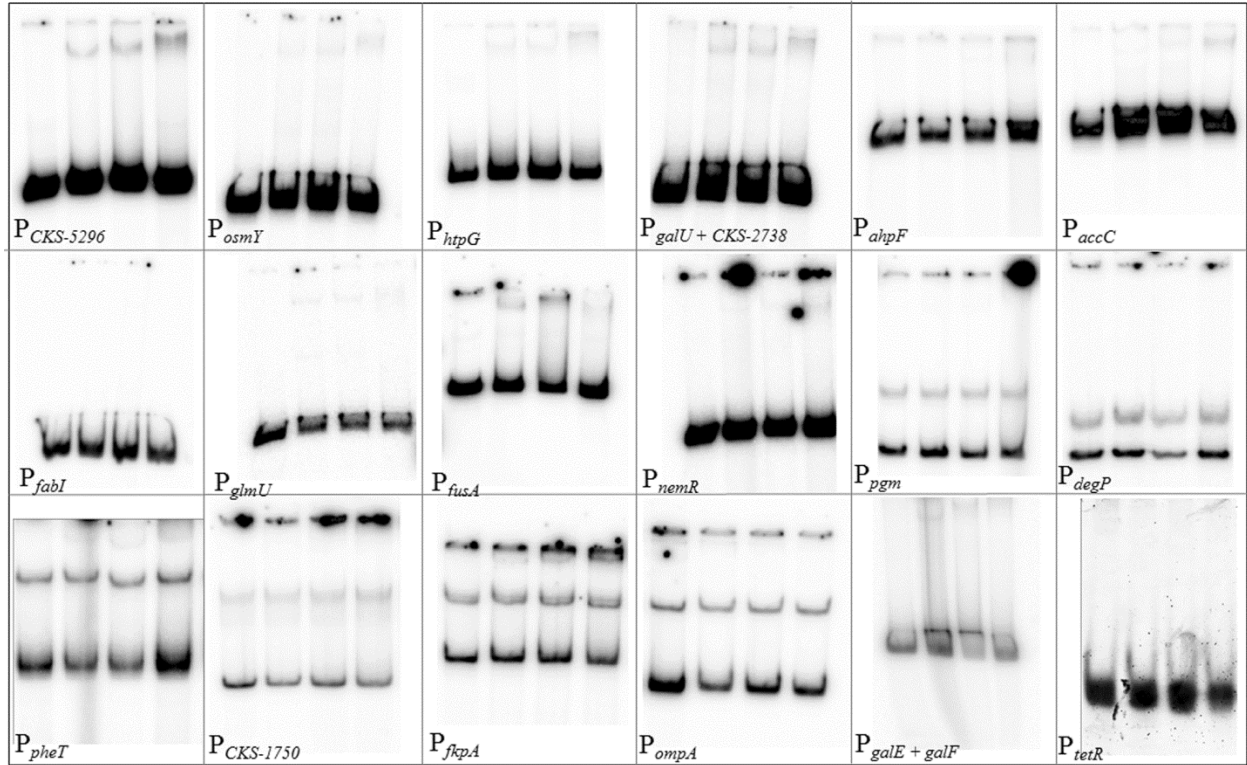

15

16 **Figure S2:** Electrophoretic mobility shift assays on the promoters of genes in the QS regulon.

17 Concentration of DNA probe in all lanes is 1 nM. Lanes within each panel labeled with gene

18 promoters consist of (left to right): DNA probe, DNA probe with 50 nM HMGE, DNA probe

19 with 100 nM HMGE, and DNA probe with 100 nM HMGE plus 100 nM unlabeled DNA probe.

20 The identity of the second band produced during PCR amplification of the gene promoters  $P_{pgm}$ ,

21  $P_{degP}$ ,  $P_{pheT}$ ,  $P_{CKS-1750}$ ,  $P_{fkpA}$ , and  $P_{ompA}$  is not known.

22

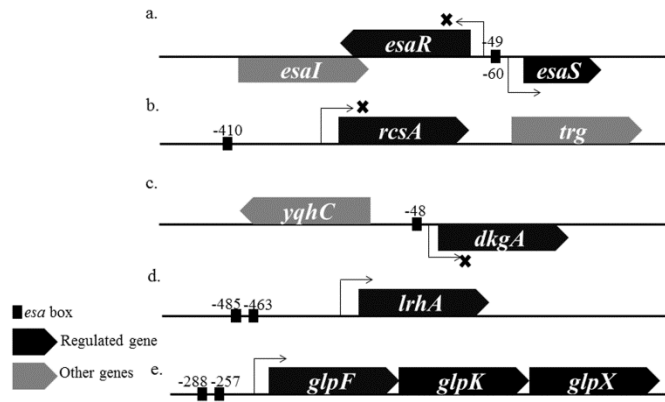

23

24 **Figure S3:** Relative positions of *esa* box on the promoters of the direct targets of EsaR. Numbers  
 25 above or below the *esa* boxes denote base pairs from translational (ATG) start sites of the  
 26 downstream open reading frames. The ‘x’ in front of the directional arrows indicates repression,  
 27 absence of ‘x’ indicates activation. Model not drawn to scale.

28
